# Supplementary material for: SKLB023 hinders renal interstitial fibrosis in obstructive nephropathy by interfering TGF-β1/Smad3 signaling
Source: Royal Society of Chemistry journal article supplement (doi:10.1039/c8ra00018b), 2018-01-01
Supplement: c8ra00018b1.pdf [file c8ra00018b1.pdf]

## SKLB023 Hinders Renal Interstitial Fibrosis in Obstructive Nephropathy by interfering TGF- $\beta$ 1/Smad3 signaling

Yanhuan Feng <sup>1</sup>, Jun Xu <sup>1</sup>, Fan Guo<sup>1</sup>, Rongshuang Huang, Min Shi, Lingzhi Li, Liang Ma\*, and Ping Fu\*

Kidney Research Institute, Division of Nephrology, West China Hospital of Sichuan University, Chengdu 610041, China.

<sup>1</sup> The authors contributed equally to the work.

\*Correspondence: Kidney Research Institute, Division of Nephrology, West China Hospital of Sichuan University, No. 37 Guoxue allay, Chengdu 610041, China. Tel.: +86 28 85164167, Fax: +86 28 85423341. E-mail address: liang\_m@scu.edu.cn (L. Ma), fupinghx@scu.edu.cn (P. Fu).

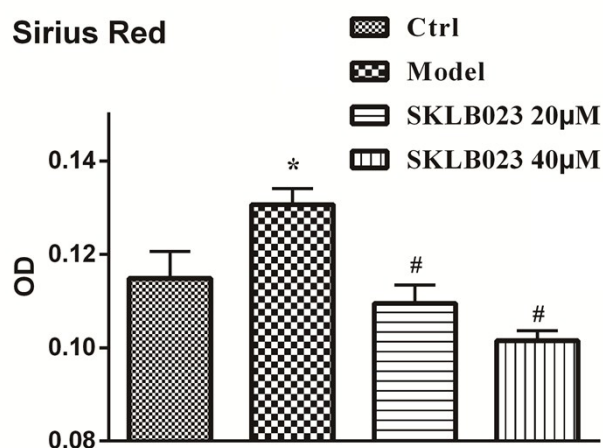

**Supplemental Figure 1.** SKLB023 inhibited TGF- $\beta$ 1-induced total collagen accumulation in NRK-49F cells. Cells cultured in 96-well plates were treated with increasing doses of SKLB023 (0-40  $\mu$ M) with 5 ng/ml TGF- $\beta$ 1 for 48 h. Total collagen accumulation was stained by Sirius Red staining and quantified by spectrophotometric analysis. \*P<0.05 versus Ctrl; #P<0.05 versus Model. Data were expressed as means  $\pm$  SD for three independent experiments.
